# Supplementary material for: TLR signals posttranscriptionally regulate the cytokine trafficking mediator sortilin
Source: PubMed Central journal article supplement (PMC4879639; doi:10.1038/srep26566), 2016-05-25
Supplement: srep26566-s1.pdf [file srep26566-s1.pdf]

## **Supplementary Information**

### **TLR signals posttranscriptionally regulate the cytokine trafficking mediator sortilin**

Toshiki Yabe-Wada, Shintaro Matsuba, Kazuya Takeda, Tetsuya Sato, Mikita Suyama, Yasuyuki Ohkawa, Toshiyuki Takai, Haifeng Shi, Caroline C. Philpott, Akira Nakamura

Supplementary Information includes:

Supplementary Table I. Primer sequences used in this work

Supplementary Table II. RIP-seq Data from PCBP1 IP Experiments, Related to Figure 5.

Supplementary Table I: Primer sequences used in this work

| Gene     | Sequence                   | Use                        | Source     |
|----------|----------------------------|----------------------------|------------|
| Gapdh    | CATGGCCTTCCGTGTTTCCTA      | qRT-PCR                    | Ref. 54    |
|          | CCTGCTTCACCACCTTCTTGAT     |                            |            |
| Sortilin | ACTTCACTGGGCTTGCTTCC       | qRT-PCR                    | This study |
|          | CCTCTTCACAATTCCGCTCA       |                            |            |
|          | TGCCTGTTGTCCTCCCCTCT       | RIP/RT-PCR                 | This study |
|          | TGCAGTGGTGGTCTTGATCCT      | qRT-PCR                    |            |
|          | GCATGTGGGGCTGTGAGGGGCAGCCG | Construction for pTRE2-CRE | This study |
|          | CCAGGCGGCCGCACACAATGCTAAA  |                            |            |
| IFNA1    | GCCTTGACACTCCTGGTACAAATGAG | qRT-PCR                    | This study |
|          | CAGCACATTGGCAGAGGAAGACAG   |                            |            |
| PCBP1    | CACGTAACGAGCCCAACTCC       | qRT-PCR                    | This study |
|          | CACCGACTCCCCTTTCTTCC       |                            |            |

## References

- 54 Tsujita, Y. *et al.* Nuclear targeting of Akt antagonizes aspects of cardiomyocyte hypertrophy. *Proc Natl Acad Sci USA* **103**, 11946-11951, (2006).
